# Supplementary material
Source: PubMed Central journal article supplement (PMC7409981)
Supplement: NIHMS1611183-supplement-Suppl_AST-2018.pdf [file NIHMS1611183-supplement-Suppl_AST-2018.pdf]

Supplemental Information

**Aerosol Size Distribution Measurement of Electronic Cigarette Emissions Using Combined Differential Mobility and Inertial Impaction Methods. Smoking Machine and Puff Topography Influence.**

Vladimir B. Mikheev<sup>a</sup>, Alexander Ivanov<sup>a</sup>, Eric A. Lucas<sup>a</sup>, Patrick L. South<sup>a</sup>, Hendrik O. Colijn<sup>b</sup>, and Pamela I. Clark<sup>c</sup>.

<sup>a</sup> Battelle Memorial Institute, Columbus, OH, USA

<sup>b</sup> Center for Electron Microscopy and Analysis, Ohio State University, Columbus, OH, USA

<sup>c</sup> University of Maryland, College Park, MD, USA

Blu e-cig

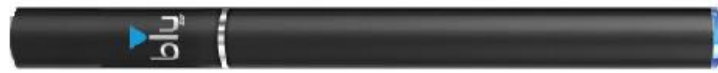

iTaste SVD

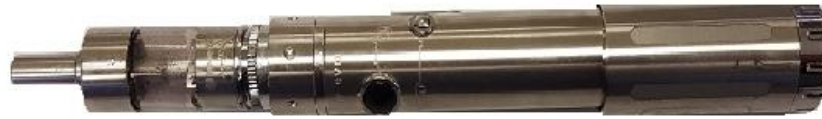

iTaste VTR

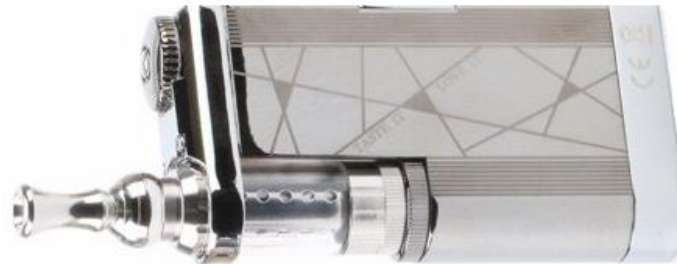

Figure S1. E—cigarettes used for the study.

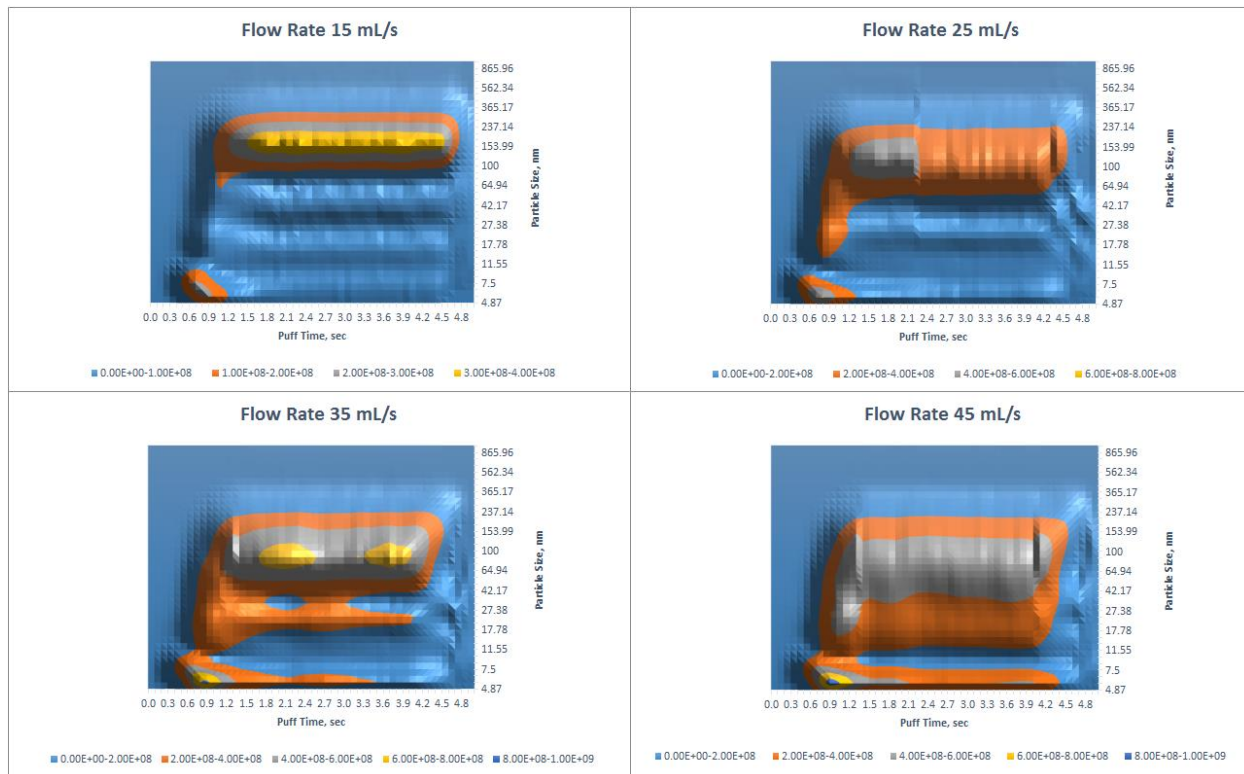

Figure S2. Aerosol Size Distribution, blu Classic Tobacco mid-nicotine. 5 s puff. Flow Rates 15, 25, 35, and 45 mL/s. Contour Plots.

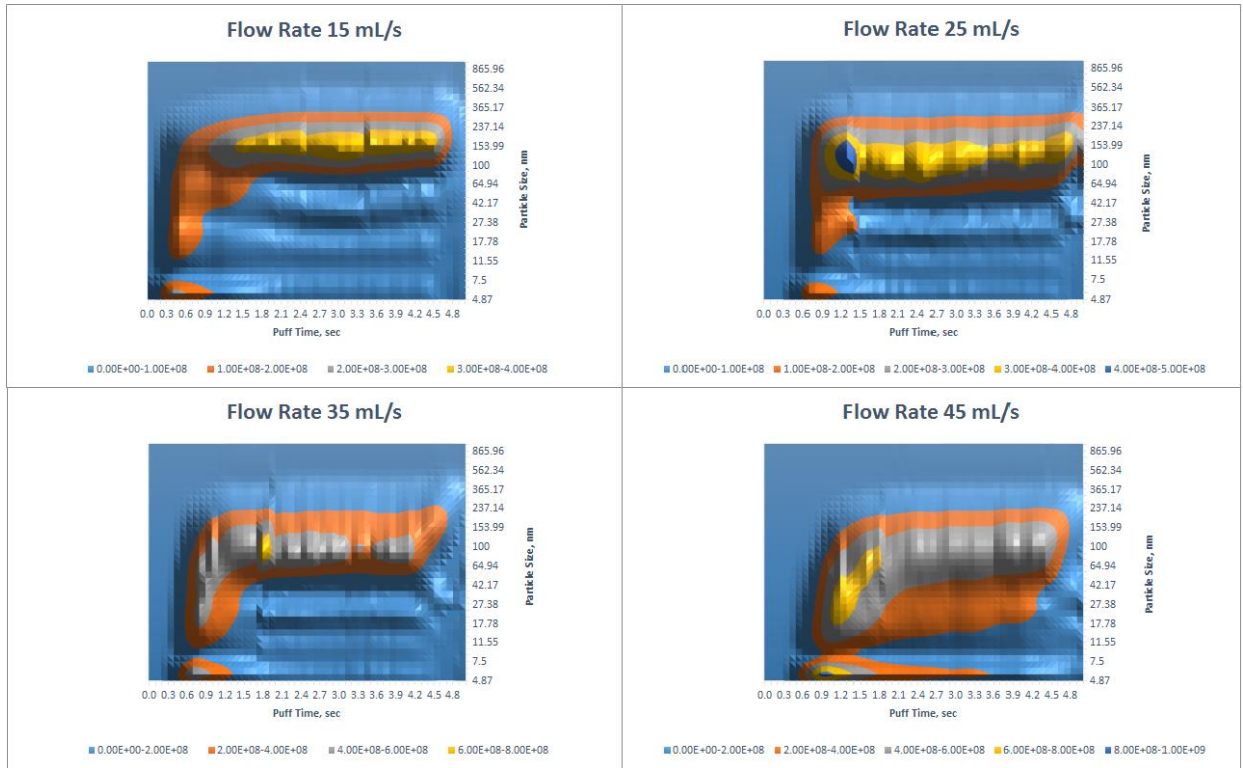

Figure S3. Aerosol Size Distribution, iTaste SVD, PG/VG=50/50, 5 V, 1.8 ohm. 5 s puff. Flow Rates 15, 25, 35, and 45 mL/s. Contour Plots.

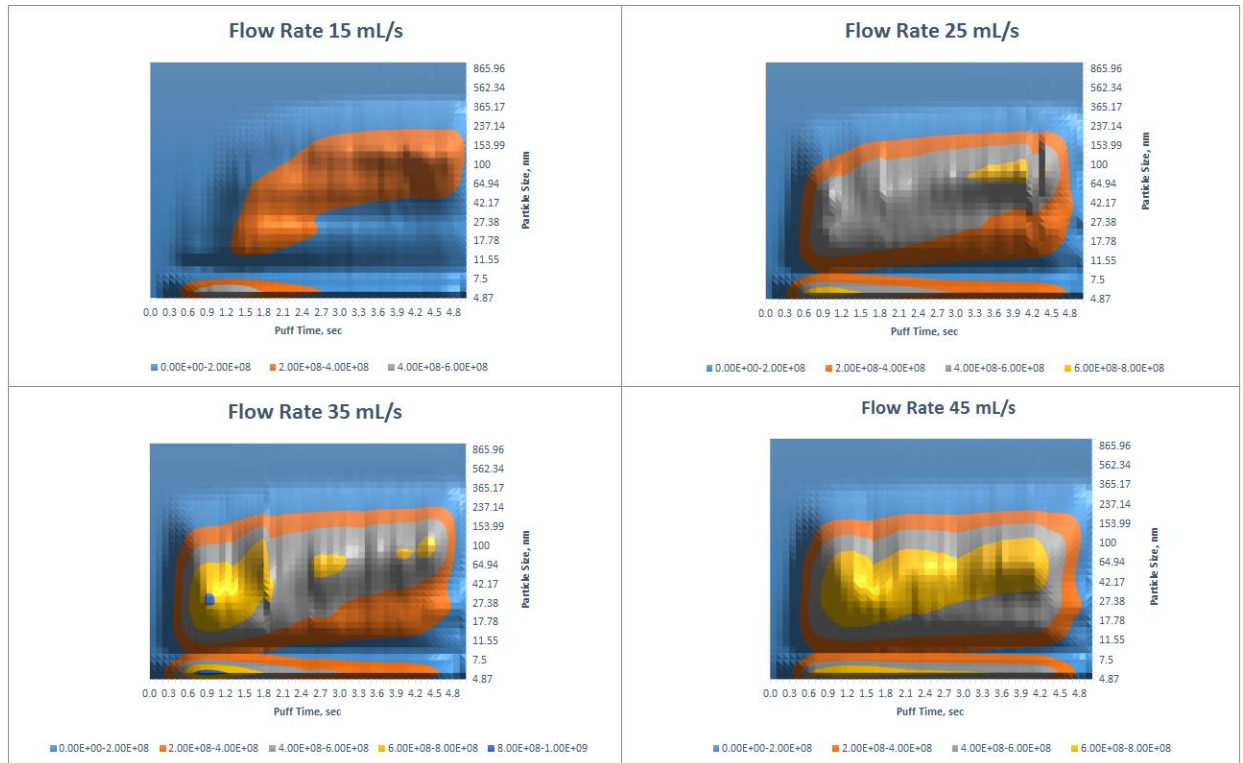

Figure S4. Aerosol Size Distribution, iTaste VTR, PG/VG=50/50, 4 V, 2.1 ohm. 5 s puff. Flow Rates 15, 25, 35, and 45 mL/s. Contour Plots.

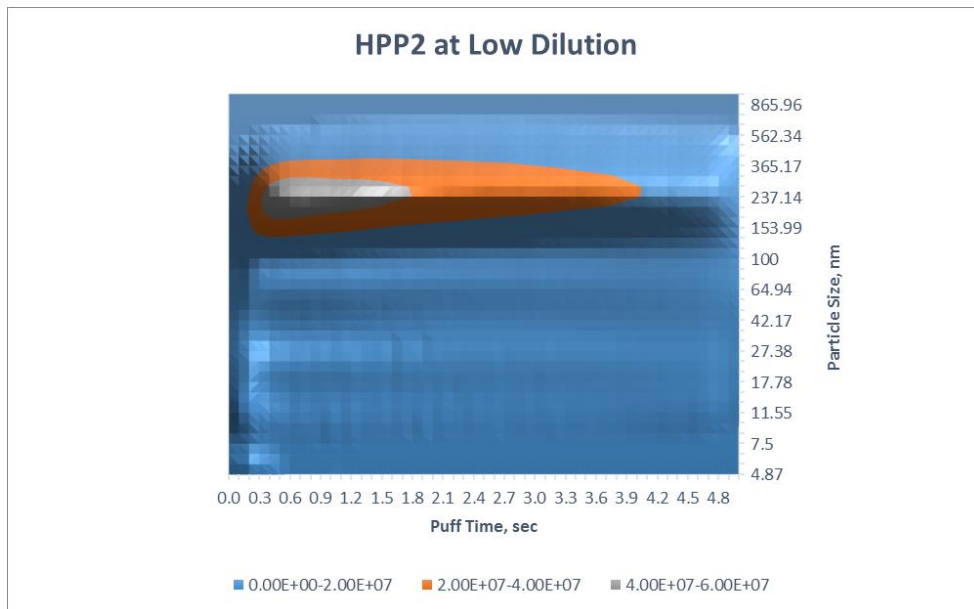

Figure S5. Aerosol Size Distribution, HPP2, blu Classic Tobacco mid-nicotine. 5 s puff. Flow Rate 25 mL/s. Contour Plot.

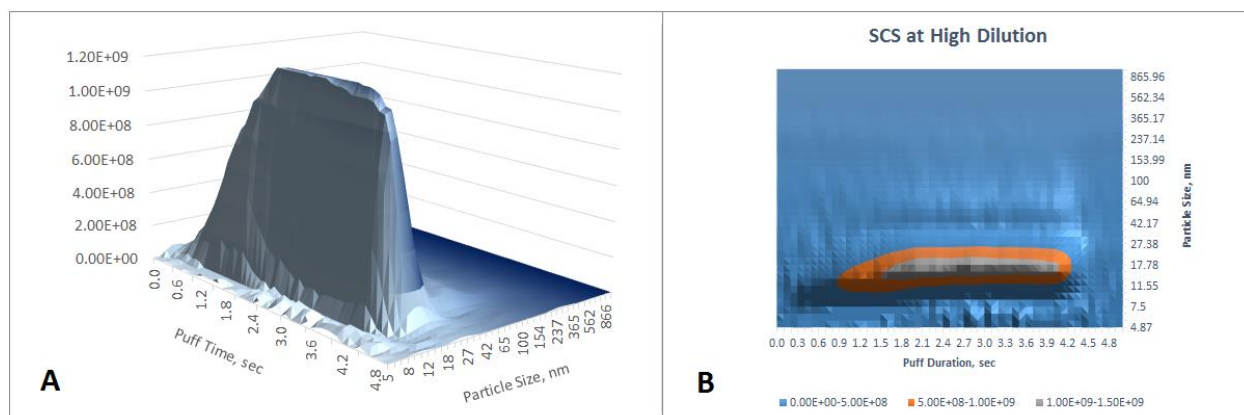

Figure S6. Aerosol Size Distribution, SCS, blu Classic Tobacco mid-nicotine. 5 s puff. Flow Rate 25 mL/s. Extra 1/500 Dilution. A - 3D image generated by DMS500 software, B - is a contour plot.

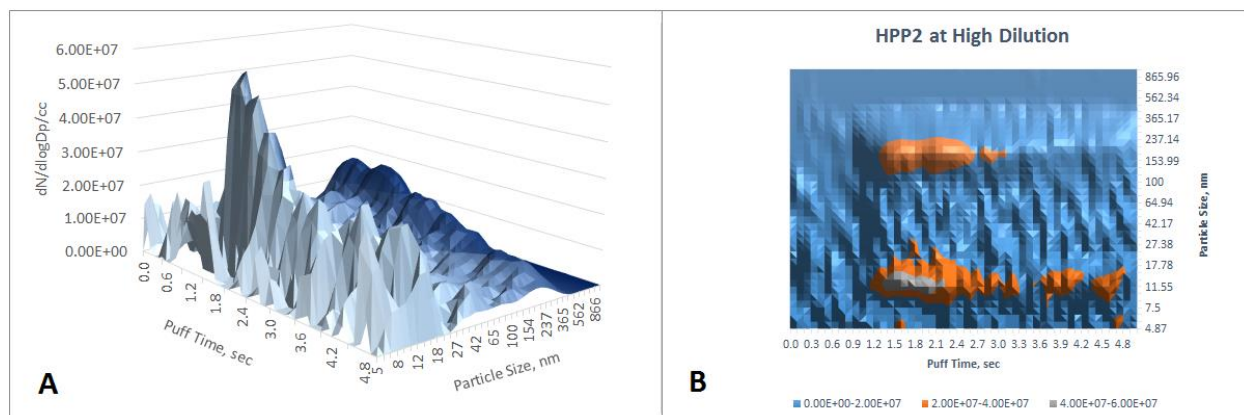

Figure S7. Aerosol Size Distribution, HPP2, blu Classic Tobacco mid-nicotine. 5 s puff. Flow Rate 25 mL/s. Extra 1/500 Dilution. A - 3D image generated by DMS500 software, B - is a contour plot.

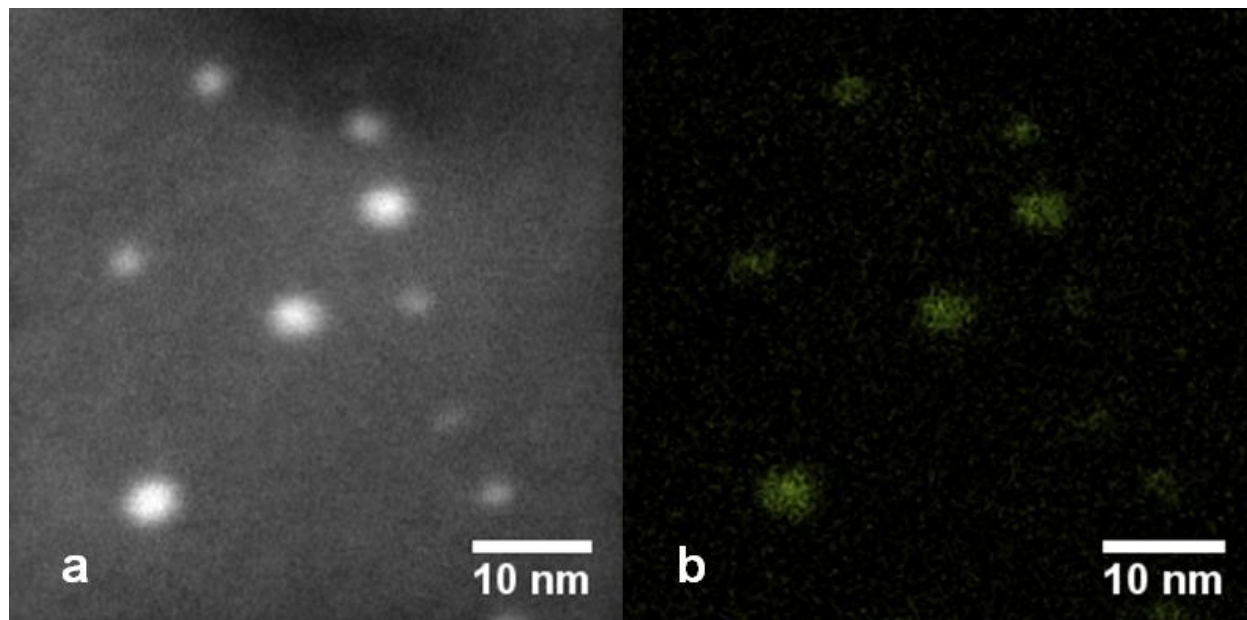

Figure S8. (a) HAADF STEM image of metallic nanoparticles collected on ELPI stage #5 (cut-off size  $\sim 93$  nm). (b) STEM EDX map indicating the distribution of copper.

Table S1. LC-TOFMS Instrument Conditions

| LC-HRMS System           |                                                                                                                                                                                                                                                                                                                                                                                                                                                                                         |                   |    |                   |   |    |     |     |    |     |    |     |     |    |     |     |       |    |     |    |    |     |
|--------------------------|-----------------------------------------------------------------------------------------------------------------------------------------------------------------------------------------------------------------------------------------------------------------------------------------------------------------------------------------------------------------------------------------------------------------------------------------------------------------------------------------|-------------------|----|-------------------|---|----|-----|-----|----|-----|----|-----|-----|----|-----|-----|-------|----|-----|----|----|-----|
| UPLC                     | Waters Acquity I-class                                                                                                                                                                                                                                                                                                                                                                                                                                                                  |                   |    |                   |   |    |     |     |    |     |    |     |     |    |     |     |       |    |     |    |    |     |
| Mass Spectrometer        | AB Sciex TripleTOF 5600                                                                                                                                                                                                                                                                                                                                                                                                                                                                 |                   |    |                   |   |    |     |     |    |     |    |     |     |    |     |     |       |    |     |    |    |     |
| Mass Spectrometer Source | DuoSpray: includes TurbolonSpray and APCI probes                                                                                                                                                                                                                                                                                                                                                                                                                                        |                   |    |                   |   |    |     |     |    |     |    |     |     |    |     |     |       |    |     |    |    |     |
| Scan Ranges              | TOF MS: 50-1000 m/z<br>IDA: 20-1000 m/z [High Resolution]                                                                                                                                                                                                                                                                                                                                                                                                                               |                   |    |                   |   |    |     |     |    |     |    |     |     |    |     |     |       |    |     |    |    |     |
| Mass Spec software       | Analyst TF v 1.6                                                                                                                                                                                                                                                                                                                                                                                                                                                                        |                   |    |                   |   |    |     |     |    |     |    |     |     |    |     |     |       |    |     |    |    |     |
| Analytical Column        | GL Sciences InertSustain C18; 2.1 × 150 mm, 3 μm                                                                                                                                                                                                                                                                                                                                                                                                                                        |                   |    |                   |   |    |     |     |    |     |    |     |     |    |     |     |       |    |     |    |    |     |
| Column Temperature       | 60°C                                                                                                                                                                                                                                                                                                                                                                                                                                                                                    |                   |    |                   |   |    |     |     |    |     |    |     |     |    |     |     |       |    |     |    |    |     |
| Autosampler Temperature  | 5°C                                                                                                                                                                                                                                                                                                                                                                                                                                                                                     |                   |    |                   |   |    |     |     |    |     |    |     |     |    |     |     |       |    |     |    |    |     |
| Mobile Phase Components  | A: 0.1% (v/v) acetic acid in water<br>B: 0.1% (v/v) acetic acid in methanol                                                                                                                                                                                                                                                                                                                                                                                                             |                   |    |                   |   |    |     |     |    |     |    |     |     |    |     |     |       |    |     |    |    |     |
| Gradient Profile         | <table border="1"> <thead> <tr> <th>Time, min</th> <th>%B</th> <th>Flow rate, mL/min</th> </tr> </thead> <tbody> <tr> <td>0</td> <td>10</td> <td>0.2</td> </tr> <tr> <td>0.5</td> <td>10</td> <td>0.2</td> </tr> <tr> <td>15</td> <td>100</td> <td>0.2</td> </tr> <tr> <td>20</td> <td>100</td> <td>0.2</td> </tr> <tr> <td>20.01</td> <td>10</td> <td>0.2</td> </tr> <tr> <td>30</td> <td>10</td> <td>0.2</td> </tr> </tbody> </table> <p>All changes linear with respect to time.</p> | Time, min         | %B | Flow rate, mL/min | 0 | 10 | 0.2 | 0.5 | 10 | 0.2 | 15 | 100 | 0.2 | 20 | 100 | 0.2 | 20.01 | 10 | 0.2 | 30 | 10 | 0.2 |
| Time, min                | %B                                                                                                                                                                                                                                                                                                                                                                                                                                                                                      | Flow rate, mL/min |    |                   |   |    |     |     |    |     |    |     |     |    |     |     |       |    |     |    |    |     |
| 0                        | 10                                                                                                                                                                                                                                                                                                                                                                                                                                                                                      | 0.2               |    |                   |   |    |     |     |    |     |    |     |     |    |     |     |       |    |     |    |    |     |
| 0.5                      | 10                                                                                                                                                                                                                                                                                                                                                                                                                                                                                      | 0.2               |    |                   |   |    |     |     |    |     |    |     |     |    |     |     |       |    |     |    |    |     |
| 15                       | 100                                                                                                                                                                                                                                                                                                                                                                                                                                                                                     | 0.2               |    |                   |   |    |     |     |    |     |    |     |     |    |     |     |       |    |     |    |    |     |
| 20                       | 100                                                                                                                                                                                                                                                                                                                                                                                                                                                                                     | 0.2               |    |                   |   |    |     |     |    |     |    |     |     |    |     |     |       |    |     |    |    |     |
| 20.01                    | 10                                                                                                                                                                                                                                                                                                                                                                                                                                                                                      | 0.2               |    |                   |   |    |     |     |    |     |    |     |     |    |     |     |       |    |     |    |    |     |
| 30                       | 10                                                                                                                                                                                                                                                                                                                                                                                                                                                                                      | 0.2               |    |                   |   |    |     |     |    |     |    |     |     |    |     |     |       |    |     |    |    |     |
| Injection Volume         | 10 μL                                                                                                                                                                                                                                                                                                                                                                                                                                                                                   |                   |    |                   |   |    |     |     |    |     |    |     |     |    |     |     |       |    |     |    |    |     |
| Run Time                 | 30 min                                                                                                                                                                                                                                                                                                                                                                                                                                                                                  |                   |    |                   |   |    |     |     |    |     |    |     |     |    |     |     |       |    |     |    |    |     |

Table S2. Newly formed organic compounds detected in blu e-cig aerosol by LC-TOFMS method.

| Flavors        | Observed m/z | LC column retention time, min | Mass Spectrometer Signal Intensity | Candidate Formula |
|----------------|--------------|-------------------------------|------------------------------------|-------------------|
| Both CC and PC | 213.07322    | 5.15                          | 20005                              | C8H11O3F3         |
|                | 287.13655    | 5.98                          | 38596                              | C10H19N6O2P       |
|                | 291.13381    | 7.33                          | 59950                              | C15H18N2O4        |
|                | 215.11858    | 8.57                          | 63037                              | C13H14N2O         |
|                | 215.11779    | 9.06                          | 57964                              | C13H14N2O         |
|                | 239.08879    | 9.25                          | 95246                              | C8H20N2P2S        |
|                | 295.14427    | 12.29                         | 527691                             | C18H18N2O2        |
|                | 309.16       | 13.25                         | 203073                             | C19H20N2O2        |
| CC             | 241.06821    | 5.35                          | 35704.5                            | C9H11O4F3         |
|                | 225.07326    | 7.05                          | 16081.5                            | C7H16N2O2S2       |
|                | 211.08645    | 8.04                          | 48740.75                           | C13H10N2O         |
|                | 255.07644    | 8.22                          | 17532.5                            | C14H10N2O3        |
|                | 293.12834    | 14.61                         | 83302.5                            | C18H16N2O2        |
| PC             | 297.15932    | 6.62                          | 31673                              | C18H20N2O2        |
|                | 289.10661    | 11.78                         | 30544                              | C14H18O2F2S       |
